# Supplementary material for: Procedural outcomes in children with mild type 1 von Willebrand disease
Source: PubMed Central journal article supplement — Res Pract Thromb Haemost. 2024 Feb 2;8(1):102334. doi: 10.1016/j.rpth.2024.102334 (PMC10909640; doi:10.1016/j.rpth.2024.102334), 2024-02-02
Supplement: mmc1.pdf [file mmc1.pdf]

Supplemental Table 1

| Major Procedure                                                                                                                                                                                                                                                                                                                                                                                       | Minor Procedure                                                                                                                                                                                                       | Dental procedure                                                                                                                           |
|-------------------------------------------------------------------------------------------------------------------------------------------------------------------------------------------------------------------------------------------------------------------------------------------------------------------------------------------------------------------------------------------------------|-----------------------------------------------------------------------------------------------------------------------------------------------------------------------------------------------------------------------|--------------------------------------------------------------------------------------------------------------------------------------------|
| <ul style="list-style-type: none"> <li>- Body cavity was entered</li> <li>- Mesenchymal barrier entered (pleura, peritoneum or dura)</li> <li>- Facial plane was opened</li> <li>- Organ was removed</li> <li>- Normal anatomy was operatively altered</li> <li>- Interventions involving joints</li> <li>- Third molar extractions</li> <li>- Surgery where severe hemorrhage is possible</li> </ul> | <ul style="list-style-type: none"> <li>- Invasive operative procedure in which only skin, mucous membranes or superficial connective tissue was manipulated</li> <li>- Gastroscopy, colonoscopy, endoscopy</li> </ul> | <ul style="list-style-type: none"> <li>- Non-third molar extraction</li> <li>- Minor procedure involving injections to the gums</li> </ul> |
